# Supplementary material for: Responsiveness and minimal important change of the Family Reported Outcome Measure (FROM-16)
Source: Springer Nature journal article supplement (doi:10.1186/s41687-024-00703-1), 2024-03-26

## Supplementary material

### Responsiveness and Minimal Important Change of the Family Reported Outcome Measure (FROM-16)

#### INDEX: Tables/figures included in the online resource

Table S1 Independent t-test for differences between male and female genders

Table S2 Classification Table for MIC improvement

Table S3 Classification Table for MIC deterioration

Table S4 Change in scores in patients and their family members across medical specialities

Figure S1-S4 Confidence calculation of  $MIC_{pred}$  and  $Adj\_MIC_{pred}$

Figure S5-S6 Flow diagram for participant recruitment

**Table S1** Independent t-test for differences between male and female genders

|                       | Mean             |                    | Mean difference | p-value * |
|-----------------------|------------------|--------------------|-----------------|-----------|
|                       | Male<br>Mean(SD) | Female<br>Mean(SD) |                 |           |
| <b>Family members</b> | (n=37)           | (n=46)             |                 |           |
| B_FROM                | 8.32 (6.88)      | 10.52 (6.71)       | -2.20           | 0.146     |
| F_FROM                | 7.24 (7.57)      | 8.80 (6.37)        | -1.56           | 0.311     |
| <b>Patients</b>       | (n=40)           | (n=43)             |                 |           |
| B_EQ-5D               | 0.75 (0.22)      | 0.73 (0.23)        | 0.02            | 0.607     |
| F_EQ-5D               | 0.82 (0.17)      | 0.78 (0.20)        | 0.04            | 0.376     |
| B_EQ-5D-VAS           | 60.25 (23.72)    | 58.91 (22.19)      | 1.34            | 0.791     |
| F_EQ-5D-VAS           | 69.83 (18.64)    | 67.74 (21.06)      | 2.09            | 0.636     |
| B_GSQ                 | 5.23 (2.81)      | 5.26 (2.17)        | -0.03           | 0.956     |
| F_GSQ                 | 3.95 (2.33)      | 4.58 (2.54)        | -0.63           | 0.242     |

\*Significant at &lt; 0.05 level.

**Table S2. Classification Table MIC improvement**

| Classification Table MIC improvement |             |             |               |                 |                                   |
|--------------------------------------|-------------|-------------|---------------|-----------------|-----------------------------------|
| Cut point                            | Sensitivity | Specificity | 1-Sensitivity | 1 - Specificity | (1-sensitivity) + [1-specificity] |
| -17                                  | 1           | 0           | 0             | 1               | 1                                 |
| -15.5                                | 1           | 0.011       | 0             | 0.989           | 0.989                             |
| -14.5                                | 1           | 0.023       | 0             | 0.977           | 0.977                             |
| -12.5                                | 1           | 0.034       | 0             | 0.966           | 0.966                             |
| -10.5                                | 1           | 0.046       | 0             | 0.954           | 0.954                             |
| -8                                   | 1           | 0.069       | 0             | 0.931           | 0.931                             |
| -5.5                                 | 0.923       | 0.08        | 0.077         | 0.92            | 0.997                             |
| -4.5                                 | 0.923       | 0.092       | 0.077         | 0.908           | 0.985                             |
| -3.5                                 | 0.923       | 0.138       | 0.077         | 0.862           | 0.939                             |
| -2.5                                 | 0.923       | 0.161       | 0.077         | 0.839           | 0.916                             |
| -1.5                                 | 0.846       | 0.241       | 0.154         | 0.759           | 0.913                             |
| -0.5                                 | 0.846       | 0.322       | 0.154         | 0.678           | 0.832                             |
| 0.5                                  | 0.692       | 0.414       | 0.308         | 0.586           | 0.894                             |
| 1.5                                  | 0.692       | 0.563       | 0.308         | 0.437           | 0.745                             |
| 2.5                                  | 0.615       | 0.713       | 0.385         | 0.287           | 0.672                             |
| 3.5                                  | 0.462       | 0.782       | 0.538         | 0.218           | 0.756                             |
| 4.5                                  | 0.462       | 0.851       | 0.538         | 0.149           | 0.687                             |
| 5.5                                  | 0.462       | 0.931       | 0.538         | 0.069           | 0.607                             |
| 6.5                                  | 0.462       | 0.977       | 0.538         | 0.023           | 0.561                             |
| 7.5                                  | 0.308       | 0.977       | 0.692         | 0.023           | 0.715                             |
| 9                                    | 0.231       | 0.989       | 0.769         | 0.011           | 0.78                              |
| 10.5                                 | 0.154       | 1           | 0.846         | 0               | 0.846                             |
| 18.5                                 | 0.077       | 1           | 0.923         | 0               | 0.923                             |
| 27                                   | 0           | 1           | 1             | 0               | 1                                 |

**Table S3 Classification Table MIC improvement**

| Classification Table MIC deterioration |             |             |               |                 |                                   |
|----------------------------------------|-------------|-------------|---------------|-----------------|-----------------------------------|
| Cut point                              | Sensitivity | Specificity | 1-Sensitivity | 1 - Specificity | (1-sensitivity) + [1-specificity] |
| -27                                    | 1           | 0           | 0             | 1               | 1                                 |
| -18.5                                  | 1           | 0.011       | 0             | 0.989           | 0.989                             |
| -10.5                                  | 1           | 0.022       | 0             | 0.978           | 0.978                             |
| -9                                     | 1           | 0.045       | 0             | 0.955           | 0.955                             |
| -7.5                                   | 1           | 0.067       | 0             | 0.933           | 0.933                             |
| -6.5                                   | 1           | 0.09        | 0             | 0.91            | 0.91                              |
| -5.5                                   | 1           | 0.135       | 0             | 0.865           | 0.865                             |
| -4.5                                   | 1           | 0.213       | 0             | 0.787           | 0.787                             |
| -3.5                                   | 1           | 0.281       | 0             | 0.719           | 0.719                             |
| -2.5                                   | 1           | 0.371       | 0             | 0.629           | 0.629                             |
| -1.5                                   | 0.909       | 0.517       | 0.091         | 0.483           | 0.574                             |
| -0.5                                   | 0.818       | 0.652       | 0.182         | 0.348           | 0.53                              |
| 0.5                                    | 0.727       | 0.753       | 0.273         | 0.247           | 0.52                              |
| 1.5                                    | 0.727       | 0.831       | 0.273         | 0.169           | 0.442                             |
| 2.5                                    | 0.455       | 0.888       | 0.545         | 0.112           | 0.657                             |
| 3.5                                    | 0.364       | 0.899       | 0.636         | 0.101           | 0.737                             |
| 4.5                                    | 0.364       | 0.944       | 0.636         | 0.056           | 0.692                             |
| 5.5                                    | 0.273       | 0.944       | 0.727         | 0.056           | 0.783                             |
| 8                                      | 0.182       | 0.955       | 0.818         | 0.045           | 0.863                             |
| 10.5                                   | 0.091       | 0.966       | 0.909         | 0.034           | 0.943                             |
| 12.5                                   | 0.091       | 0.978       | 0.909         | 0.022           | 0.931                             |
| 14.5                                   | 0           | 0.978       | 1             | 0.022           | 1.022                             |
| 15.5                                   | 0           | 0.989       | 1             | 0.011           | 1.011                             |
| 17                                     | 0           | 1           | 1             | 0               | 1                                 |

**Table S4 Change in scores in patients and their family members across medical specialities**

| Medical specialty          | Family Member/Partner |        |                |       |       | Patient |         |                 |        |        |
|----------------------------|-----------------------|--------|----------------|-------|-------|---------|---------|-----------------|--------|--------|
|                            | B_FROM                | F_FROM | Mean diff FROM | ES    | SRM   | B_EQ-5D | F_EQ-5D | Mean diff EQ-5D | ES     | SRM    |
| <b>Dermatology (n=33)</b>  | 9.03                  | 7.12   | 1.91           | 0.258 | 0.310 | 0.71    | 0.80    | -0.09           | -0.374 | -0.552 |
| <b>Diabetes (n=29)</b>     | 8.38                  | 6.93   | 1.45           | 0.242 | 0.424 | 0.79    | 0.80    | -0.01           | -0.056 | -0.125 |
| <b>Rheumatology (n=15)</b> | 11.40                 | 11.27  | 0.13           | 0.022 | 0.024 | 0.68    | 0.76    | -0.08           | -0.489 | -0.517 |
| <b>Haematology (n=5)</b>   | 13.60                 | 12.60  | 1.00           | 0.101 | 0.365 | 0.78    | 0.79    | -0.01           | -0.099 | -0.447 |
| <b>IBD (n=1)</b>           | 12.00                 | 5.00   | 7.00           |       |       | 0.81    | 1.00    | 0.19            |        |        |

*IBD, Inflammatory Bowel Disease; ES, Effect Size; SRM, Standard Response Mean*

**Confidence Interval calculation of MIC<sub>pred</sub> and Adj\_MIC<sub>pred</sub>**

We entered the output of the regression analysis into the Excel worksheet given by Terulin and colleagues in 2015 (Available at:

<https://view.officeapps.live.com/op/view.aspx?src=https%3A%2F%2Fars.els-cdn.com%2Fcontent%2Fimage%2F1-s2.0-S0895435615001602-mmc2.xlsx&wdOrigin=BROWSELINK>

to obtain confidence interval values for MIC pred and Adj MIC predict. Below are screenshots of Excel sheet for confidence interval calculation for MIC pred and Adj\_MIC pred for Improvement and Deterioration.

Figure S1 Calculating 95% confidence intervals MICpred (Improvement)

|     |                               |        |             |        |  |
|-----|-------------------------------|--------|-------------|--------|--|
| 1   |                               |        |             |        |  |
| 2   | Prevalence (0-1)              | 0.130  |             |        |  |
| 3   | Change score (X) =            | 2.498  |             |        |  |
| 4   | Intercept (C) =               | -2.423 | se(C) =     | 0.418  |  |
| 5   | Regression coeff (B)=         | 0.209  | se(B) =     | 0.082  |  |
| 6   |                               |        | r(C-B) =    | -0.648 |  |
| 7   | ln(odds-post) =               | -1.901 | se(ln(odds) | 0.325  |  |
| 8   | odds(post)* =                 | 0.149  |             |        |  |
| 9   | odds(pre) =                   | 0.149  |             |        |  |
| 10  | ln(odds-pre)                  | -1.901 |             |        |  |
| 11  | ln(oddspost)lo =              | -1.264 | odds(post)l | 0.283  |  |
| 12  | ln(oddspost)hi =              | -2.538 | odds(post)h | 0.079  |  |
| 13  |                               |        |             |        |  |
| 14  | LR =                          | 1.000  |             |        |  |
| 15  | LR(upper limit) =             | 1.891  |             |        |  |
| 16  | LR(lower limit) =             | 0.529  |             |        |  |
| 17  |                               |        |             |        |  |
| 18  | prob-post =                   | 0.130  |             |        |  |
| 19  | prob-post(lo) =               | 0.220  |             |        |  |
| 20  | prob-post(hi) =               | 0.073  |             |        |  |
| 21  |                               |        |             |        |  |
| 22  | X for which LR=1              | 2.498  |             |        |  |
| 23  | X for which LR(upper limit)=1 | -3.574 |             |        |  |
| 24  | X for which LR(lower limit)=1 | 6.241  |             |        |  |
| 25  |                               |        |             |        |  |
| 26  |                               |        |             |        |  |
| 27  |                               |        |             |        |  |
| 28  |                               |        |             |        |  |
| 29  |                               |        |             |        |  |
| 30  |                               |        |             |        |  |
| 31  |                               |        |             |        |  |
| 32  |                               |        |             |        |  |
| 33  |                               |        |             |        |  |
| 34  |                               |        |             |        |  |
| 35  |                               |        |             |        |  |
| 36  |                               |        |             |        |  |
| 37  |                               |        |             |        |  |
| 38  |                               |        |             |        |  |
| 39  |                               |        |             |        |  |
| 40  |                               |        |             |        |  |
| 41  |                               |        |             |        |  |
| 42  |                               |        |             |        |  |
| 43  |                               |        |             |        |  |
| 44  |                               |        |             |        |  |
| 45  |                               |        |             |        |  |
| 46  |                               |        |             |        |  |
| 47  |                               |        |             |        |  |
| 48  |                               |        |             |        |  |
| 49  |                               |        |             |        |  |
| 50  |                               |        |             |        |  |
| 51  |                               |        |             |        |  |
| 52  |                               |        |             |        |  |
| 53  |                               |        |             |        |  |
| 54  |                               |        |             |        |  |
| 55  |                               |        |             |        |  |
| 56  |                               |        |             |        |  |
| 57  |                               |        |             |        |  |
| 58  |                               |        |             |        |  |
| 59  |                               |        |             |        |  |
| 60  |                               |        |             |        |  |
| 61  |                               |        |             |        |  |
| 62  |                               |        |             |        |  |
| 63  |                               |        |             |        |  |
| 64  |                               |        |             |        |  |
| 65  |                               |        |             |        |  |
| 66  |                               |        |             |        |  |
| 67  |                               |        |             |        |  |
| 68  |                               |        |             |        |  |
| 69  |                               |        |             |        |  |
| 70  |                               |        |             |        |  |
| 71  |                               |        |             |        |  |
| 72  |                               |        |             |        |  |
| 73  |                               |        |             |        |  |
| 74  |                               |        |             |        |  |
| 75  |                               |        |             |        |  |
| 76  |                               |        |             |        |  |
| 77  |                               |        |             |        |  |
| 78  |                               |        |             |        |  |
| 79  |                               |        |             |        |  |
| 80  |                               |        |             |        |  |
| 81  |                               |        |             |        |  |
| 82  |                               |        |             |        |  |
| 83  |                               |        |             |        |  |
| 84  |                               |        |             |        |  |
| 85  |                               |        |             |        |  |
| 86  |                               |        |             |        |  |
| 87  |                               |        |             |        |  |
| 88  |                               |        |             |        |  |
| 89  |                               |        |             |        |  |
| 90  |                               |        |             |        |  |
| 91  |                               |        |             |        |  |
| 92  |                               |        |             |        |  |
| 93  |                               |        |             |        |  |
| 94  |                               |        |             |        |  |
| 95  |                               |        |             |        |  |
| 96  |                               |        |             |        |  |
| 97  |                               |        |             |        |  |
| 98  |                               |        |             |        |  |
| 99  |                               |        |             |        |  |
| 100 |                               |        |             |        |  |

Figure S2 Calculating 95% confidence intervals Adj\_MICpred (Improvement)

|     |                               |        |             |        |  |
|-----|-------------------------------|--------|-------------|--------|--|
| 1   |                               |        |             |        |  |
| 2   |                               |        |             |        |  |
| 3   | Prevalence (0-1)              | 0.130  |             |        |  |
| 4   | Change score (X) =            | 3.867  |             |        |  |
| 5   | Intercept (C) =               | -2.423 | se(C) =     | 0.418  |  |
| 6   | Regression coeff (B)=         | 0.209  | se(B) =     | 0.082  |  |
| 7   |                               |        | r(C-B) =    | -0.648 |  |
| 8   | ln(odds-post) =               | -1.615 | se(ln(odds) | 0.322  |  |
| 9   | odds(post)* =                 | 0.199  |             |        |  |
| 10  | odds(pre) =                   | 0.199  |             |        |  |
| 11  | ln(odds-pre)                  | -1.615 |             |        |  |
| 12  | ln(oddspost)lo =              | -0.984 | odds(post)  | 0.374  |  |
| 13  | ln(oddspost)hi =              | -2.245 | odds(post)  | 0.106  |  |
| 14  |                               |        |             |        |  |
| 15  | LR =                          | 1.000  |             |        |  |
| 16  | LR(upper limit) =             | 1.879  |             |        |  |
| 17  | LR(lower limit) =             | 0.532  |             |        |  |
| 18  |                               |        |             |        |  |
| 19  | prob-post =                   | 0.166  |             |        |  |
| 20  | prob-post(lo) =               | 0.272  |             |        |  |
| 21  | prob-post(hi) =               | 0.096  |             |        |  |
| 22  |                               |        |             |        |  |
| 23  | X for which LR=1              | 3.867  |             |        |  |
| 24  | X for which LR(upper limit)=1 | -0.105 |             |        |  |
| 25  | X for which LR(lower limit)=1 | 9.469  |             |        |  |
| 26  |                               |        |             |        |  |
| 27  |                               |        |             |        |  |
| 28  |                               |        |             |        |  |
| 29  |                               |        |             |        |  |
| 30  |                               |        |             |        |  |
| 31  |                               |        |             |        |  |
| 32  |                               |        |             |        |  |
| 33  |                               |        |             |        |  |
| 34  |                               |        |             |        |  |
| 35  |                               |        |             |        |  |
| 36  |                               |        |             |        |  |
| 37  |                               |        |             |        |  |
| 38  |                               |        |             |        |  |
| 39  |                               |        |             |        |  |
| 40  |                               |        |             |        |  |
| 41  |                               |        |             |        |  |
| 42  |                               |        |             |        |  |
| 43  |                               |        |             |        |  |
| 44  |                               |        |             |        |  |
| 45  |                               |        |             |        |  |
| 46  |                               |        |             |        |  |
| 47  |                               |        |             |        |  |
| 48  |                               |        |             |        |  |
| 49  |                               |        |             |        |  |
| 50  |                               |        |             |        |  |
| 51  |                               |        |             |        |  |
| 52  |                               |        |             |        |  |
| 53  |                               |        |             |        |  |
| 54  |                               |        |             |        |  |
| 55  |                               |        |             |        |  |
| 56  |                               |        |             |        |  |
| 57  |                               |        |             |        |  |
| 58  |                               |        |             |        |  |
| 59  |                               |        |             |        |  |
| 60  |                               |        |             |        |  |
| 61  |                               |        |             |        |  |
| 62  |                               |        |             |        |  |
| 63  |                               |        |             |        |  |
| 64  |                               |        |             |        |  |
| 65  |                               |        |             |        |  |
| 66  |                               |        |             |        |  |
| 67  |                               |        |             |        |  |
| 68  |                               |        |             |        |  |
| 69  |                               |        |             |        |  |
| 70  |                               |        |             |        |  |
| 71  |                               |        |             |        |  |
| 72  |                               |        |             |        |  |
| 73  |                               |        |             |        |  |
| 74  |                               |        |             |        |  |
| 75  |                               |        |             |        |  |
| 76  |                               |        |             |        |  |
| 77  |                               |        |             |        |  |
| 78  |                               |        |             |        |  |
| 79  |                               |        |             |        |  |
| 80  |                               |        |             |        |  |
| 81  |                               |        |             |        |  |
| 82  |                               |        |             |        |  |
| 83  |                               |        |             |        |  |
| 84  |                               |        |             |        |  |
| 85  |                               |        |             |        |  |
| 86  |                               |        |             |        |  |
| 87  |                               |        |             |        |  |
| 88  |                               |        |             |        |  |
| 89  |                               |        |             |        |  |
| 90  |                               |        |             |        |  |
| 91  |                               |        |             |        |  |
| 92  |                               |        |             |        |  |
| 93  |                               |        |             |        |  |
| 94  |                               |        |             |        |  |
| 95  |                               |        |             |        |  |
| 96  |                               |        |             |        |  |
| 97  |                               |        |             |        |  |
| 98  |                               |        |             |        |  |
| 99  |                               |        |             |        |  |
| 100 |                               |        |             |        |  |

Figure S3 Calculating 95% confidence intervals MICpred (deterioration)

|    | A | B                             | C | D | E      | F | G                  | H      | I |
|----|---|-------------------------------|---|---|--------|---|--------------------|--------|---|
| 1  |   |                               |   |   |        |   |                    |        |   |
| 2  |   | Prevalence (0-1)              |   |   | 0.110  |   |                    |        |   |
| 3  |   | Change score (X) =            |   |   | 0.7811 |   |                    |        |   |
| 4  |   | Intercept (C) =               |   |   | -2.229 |   | se(C) =            | 0.365  |   |
| 5  |   | Regression coeff (B)=         |   |   | 0.177  |   | se(B) =            | 0.061  |   |
| 6  |   |                               |   |   |        |   | r(C-B) =           | -0.349 |   |
| 7  |   | ln(odds-post) =               |   |   | -2.091 |   | se(ln(oddspost)) = | 0.351  |   |
| 8  |   | odds(post)* =                 |   |   | 0.124  |   |                    |        |   |
| 9  |   | odds(pre) =                   |   |   | 0.124  |   |                    |        |   |
| 10 |   | ln(odds-pre)                  |   |   | -2.091 |   |                    |        |   |
| 11 |   | ln(oddspost)lo =              |   |   | -1.402 |   | odds(post)lo =     | 0.246  |   |
| 12 |   | ln(oddspost)hi =              |   |   | -2.779 |   | odds(post)hi =     | 0.062  |   |
| 13 |   |                               |   |   |        |   |                    |        |   |
| 14 |   | LR =                          |   |   | 1.000  |   |                    |        |   |
| 15 |   | LR(upper limit) =             |   |   | 1.991  |   |                    |        |   |
| 16 |   | LR(lower limit) =             |   |   | 0.502  |   |                    |        |   |
| 17 |   |                               |   |   |        |   |                    |        |   |
| 18 |   | prob-post =                   |   |   | 0.110  |   |                    |        |   |
| 19 |   | prob-post(lo) =               |   |   | 0.197  |   |                    |        |   |
| 20 |   | prob-post(hi) =               |   |   | 0.058  |   |                    |        |   |
| 21 |   |                               |   |   |        |   |                    |        |   |
| 22 |   | X for which LR=1              |   |   | 0.781  |   |                    |        |   |
| 23 |   | X for which LR(upper limit)=1 |   |   | -5.700 |   |                    |        |   |
| 24 |   | X for which LR(lower limit)=1 |   |   | 5.070  |   |                    |        |   |
| 25 |   |                               |   |   |        |   |                    |        |   |
| 26 |   |                               |   |   |        |   |                    |        |   |
| 27 |   |                               |   |   |        |   |                    |        |   |
| 28 |   |                               |   |   |        |   |                    |        |   |
| 29 |   |                               |   |   |        |   |                    |        |   |

Figure S4 Calculating 95% confidence intervals Adj\_MICpred (deterioration)

|    | A | B                             | C | D | E      | F | G                  | H      | I | J |
|----|---|-------------------------------|---|---|--------|---|--------------------|--------|---|---|
| 1  |   | Prevalence (0-1)              |   |   | 0.110  |   |                    |        |   |   |
| 2  |   | Change score (X) =            |   |   | 2.287  |   |                    |        |   |   |
| 3  |   | Intercept (C) =               |   |   | -2.229 |   | se(C) =            | 0.365  |   |   |
| 4  |   | Regression coeff (B)=         |   |   | 0.177  |   | se(B) =            | 0.061  |   |   |
| 5  |   |                               |   |   |        |   | r(C-B) =           | -0.349 |   |   |
| 6  |   | ln(odds-post) =               |   |   | -1.824 |   | se(ln(oddspost)) = | 0.342  |   |   |
| 7  |   | odds(post)* =                 |   |   | 0.161  |   |                    |        |   |   |
| 8  |   | odds(pre) =                   |   |   | 0.161  |   |                    |        |   |   |
| 9  |   | ln(odds-pre)                  |   |   | -1.824 |   |                    |        |   |   |
| 10 |   | ln(oddspost)lo =              |   |   | -1.153 |   | odds(post)lo =     | 0.316  |   |   |
| 11 |   | ln(oddspost)hi =              |   |   | -2.495 |   | odds(post)hi =     | 0.082  |   |   |
| 12 |   |                               |   |   |        |   |                    |        |   |   |
| 13 |   | LR =                          |   |   | 1.000  |   |                    |        |   |   |
| 14 |   | LR(upper limit) =             |   |   | 1.956  |   |                    |        |   |   |
| 15 |   | LR(lower limit) =             |   |   | 0.511  |   |                    |        |   |   |
| 16 |   |                               |   |   |        |   |                    |        |   |   |
| 17 |   | prob-post =                   |   |   | 0.139  |   |                    |        |   |   |
| 18 |   | prob-post(lo) =               |   |   | 0.240  |   |                    |        |   |   |
| 19 |   | prob-post(hi) =               |   |   | 0.076  |   |                    |        |   |   |
| 20 |   |                               |   |   |        |   |                    |        |   |   |
| 21 |   | X for which LR=1              |   |   | 2.287  |   |                    |        |   |   |
| 22 |   | X for which LR(upper limit)=1 |   |   | -2.687 |   |                    |        |   |   |
| 23 |   | X for which LR(lower limit)=1 |   |   | 7.594  |   |                    |        |   |   |
| 24 |   |                               |   |   |        |   |                    |        |   |   |
| 25 |   |                               |   |   |        |   |                    |        |   |   |
| 26 |   |                               |   |   |        |   |                    |        |   |   |
| 27 |   |                               |   |   |        |   |                    |        |   |   |
| 28 |   |                               |   |   |        |   |                    |        |   |   |
| 29 |   |                               |   |   |        |   |                    |        |   |   |

**Figure S5:** Flow chart of recruitment: Baseline to follow-up (Responsiveness study)

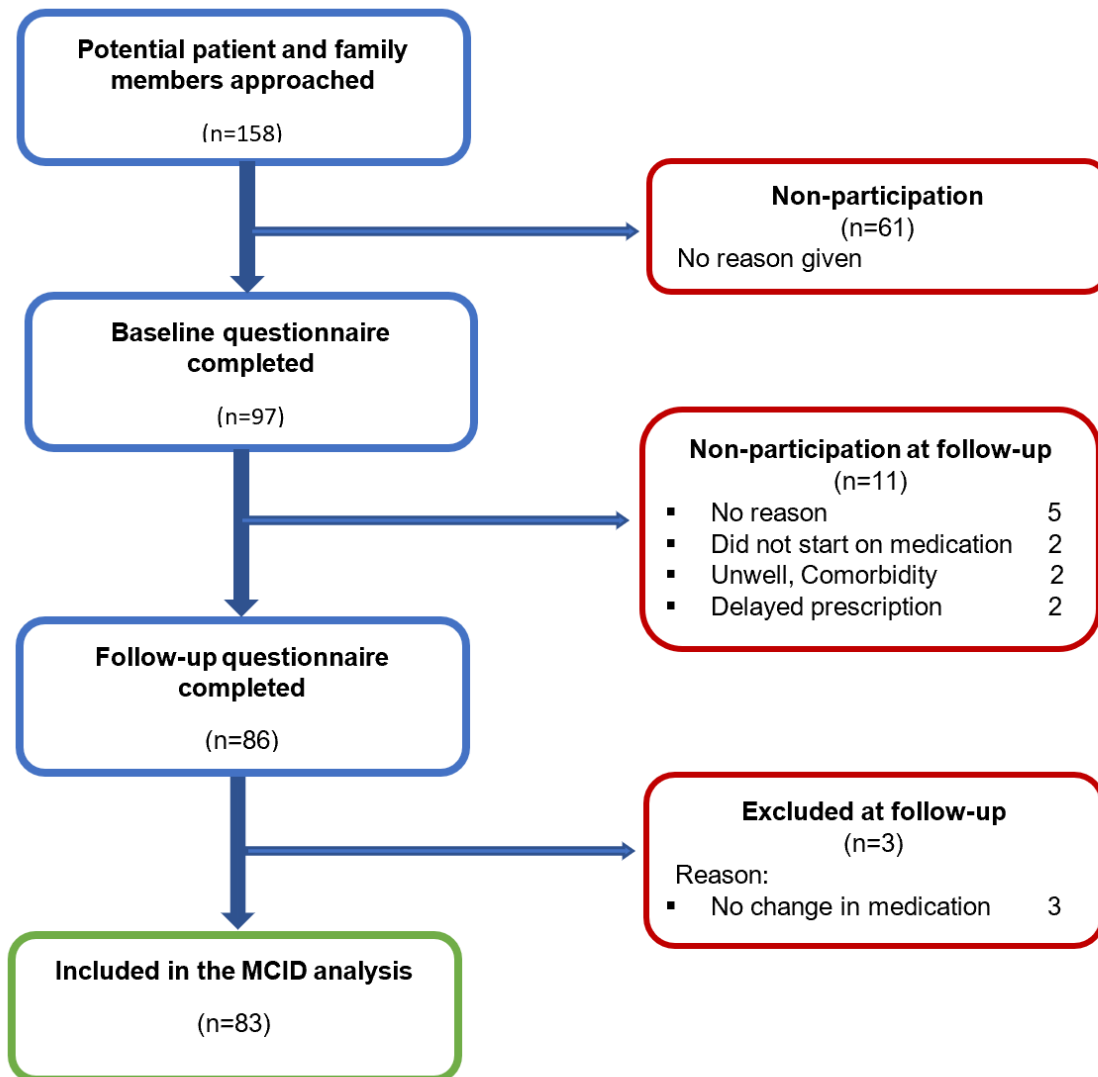

**Figure S6:** Flow chart of recruitment: Baseline to follow-up (MIC study)

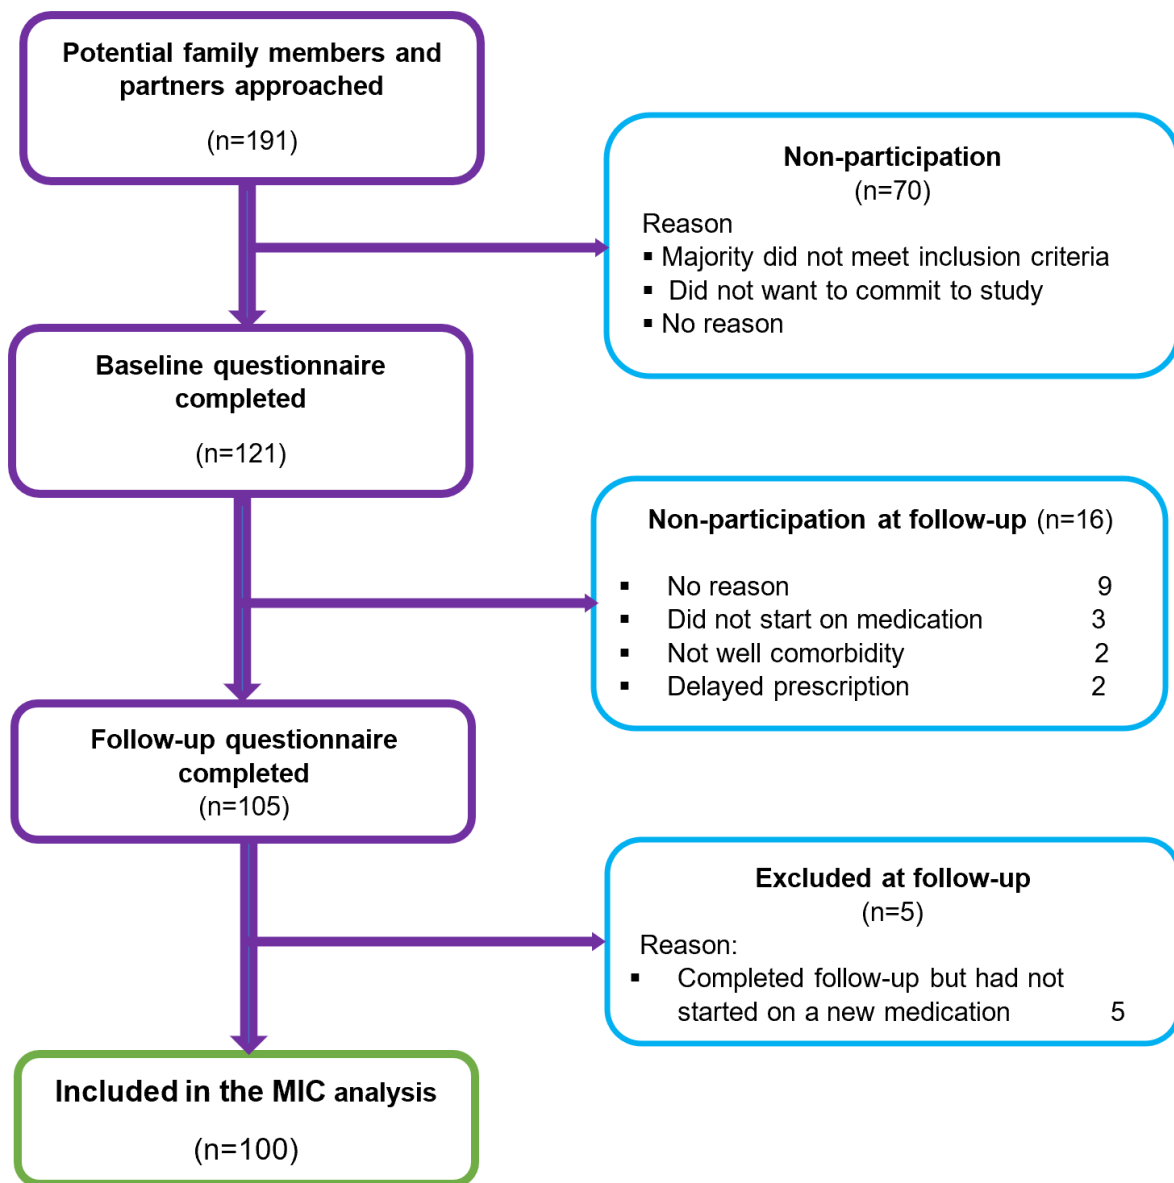

Supplement: MOESM1 [file 41687_2024_703_MOESM1_ESM.pdf]
